# Supplementary material for: Decitabine Downregulates TIGAR to Induce Apoptosis and Autophagy in Myeloid Leukemia Cells
Source: PubMed Central journal article supplement (PMC7836025; doi:10.1155/2021/8877460), 2021-01-18

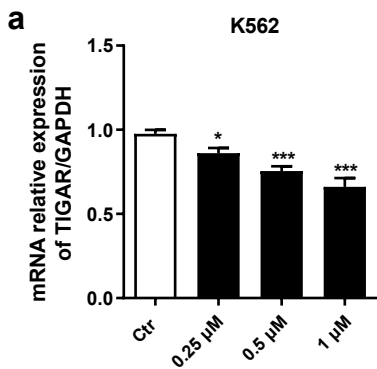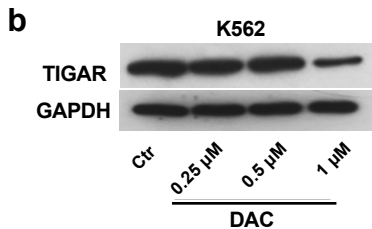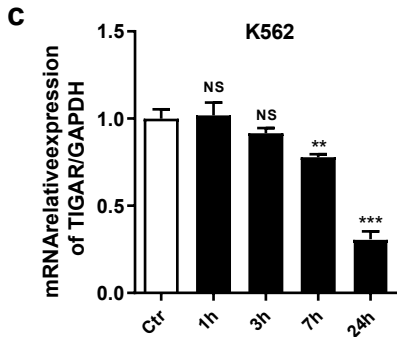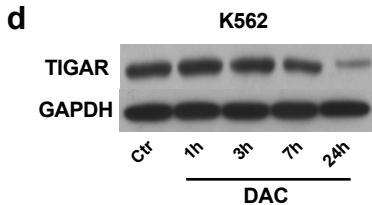

Supplement: 8877460.f1.pdf [file 8877460.f1.pdf]
